# Supplementary material for: The Paradox of Preparedness - Cold-Related Health Risks in Ukraine's War-Torn Winter
Source: Research Square preprint supplement (doi:10.21203/rs.3.rs-7370640/v1), 2025-08-18
Supplement: Supplementary file 1 [file 467818cda5353e42278c2c58.docx]

**Supplement texts**

**Research Methodology**

**Data Collection and Preparation**

The dataset integrated individual features, survey responses, and dependency indicators. The current analysis targeted individuals above 60 years (N = 1045), identified by a binary dependency indicator. The outcome variables (cold injury and respiratory infections) were binary, with a prevalence of cold injuries (90, 8.61%) and respiratory infections (898, 86%) among older adults. The predictors include socioeconomic status (e.g., employment), housing conditions (e.g., repairs), and environmental factors (e.g., heating). Preprocessing filtered rare categories (<5% prevalence) to reduce noise and used one-hot encoding to convert categorical variables into binary features for modeling. For analyses considering home heating, all heating systems, including furnaces, boilers, heat pumps, gas or electric heaters, wood stoves, fireplaces, radiant floor heat, combined heat and power, diesel generators, and solar heating, were grouped under the single category of "heating".

#### **Machine Learning Models**

Support Vector Machine (SVM) was justified by its proven effectiveness in managing high-dimensional data, providing strong boundary generalization, and suitability in scenarios with complex class distributions, validated via holdout testing. Gradient Boosting was chosen for its flexibility and capacity to reduce classification errors progressively. This is especially useful for capturing nuanced predictive relationships rigorously tested through cross-validation. Finally, LightGBM was utilized for its computational efficiency, effectiveness with categorical features, and scalability to large datasets, validated on a separate holdout set. Performance evaluation used test accuracy, baseline accuracy, and Area Under the ROC Curve (AUC). Feature importance was assessed with SHAP values for Gradient Boosting and permutation importance for Random Forest, enhancing predictor interpretability.
