# Supplementary material for: The Paradox of Preparedness - Cold-Related Health Risks in Ukraine's War-Torn Winter
Source: Research Square preprint supplement (doi:10.21203/rs.3.rs-7370640/v1), 2025-08-18
Supplement: Supplementary file 2 [file 741dc2e2e6be65a23cabd98d.docx]

**Table 1. Random forest-based permutation of features in out-of-bag samples to assess accuracy drops and average reduction in Gini impurity**

| Variables | No cold injuries | Cold injuries | Mean Decrease Accuracy | Mean Decrease Gini |
| --- | --- | --- | --- | --- |
| Installed Windows (No) | 0.04 | 0.03 | 0.04 | 39.82 |
| Purchased logs (No need) | 0.02 | 0.04 | 0.03 | 31.16 |
| Installed insulation (No) | 0.03 | 0.03 | 0.03 | 28.85 |
| Performed repairs (No) | 0.02 | 0.05 | 0.03 | 27.38 |
| Purchased logs (No) | 0.02 | 0.03 | 0.02 | 30.56 |
| Heating without electricity (Yes) | 0.02 | 0.03 | 0.02 | 30.90 |
| Marital status (In a relationship, living together) | 0.02 | 0.02 | 0.02 | 26.41 |
| Installed Windows (No need) | 0.02 | 0.01 | 0.02 | 18.08 |

**Table 2. Analysis of Frequency: the main effects, i.e., the individual impact of significant categorical features & interaction effects (Significant Interactions)**

| Variables | G | *df* | G-corrected | *p* | *η*² |
| --- | --- | --- | --- | --- | --- |
| Total | 1,309.99 | 5 |  |  |  |
| outcome | 599.77 | 1 | 599.48 | < .001*** | 0.36 |
| Location | 704.01 | 2 | 703.56 | < .001*** | 0.40 |
| Outcome: Location | 6.22 | 2 | 6.20 | .045* | 0.56 |
| Internally displaced | 821.25 | 1 | 820.85 | < .001*** | 0.44 |
| Outcome: Internally displaced | 13.42 | 1 | 13.38 | < .001*** | 0.58 |
| War affected | 188.48 | 1 | 188.39 | < .001*** | 0.15 |
| Outcome: War affected | 4.67 | 1 | 4.65 | .031* | 0.43 |
| Marital status | 421.31 | 4 | 420.90 | < .001*** | 0.29 |
| Outcome: Marital status | 19.71 | 4 | 19.64 | .001*** | 0.50 |
| Purchased warm clothes | 196.54 | 2 | 196.41 | < .001*** | 0.16 |
| Outcome: Purchased warm clothes | 15.30 | 2 | 15.26 | < .001*** | 0.44 |
| Stored food water | 496.64 | 2 | 496.32 | < .001*** | 0.32 |
| Outcome: Stored food and water | 18.65 | 2 | 18.60 | < .001*** | 0.52 |
| Purchased logs | 24.89 | 2 | 24.87 | < .001*** | 0.02 |
| Outcome: Purchased logs | 12.63 | 2 | 12.60 | .002** | 0.38 |
| Installed insulation | 225.22 | 2 | 225.07 | < .001*** | 0.18 |
| Outcome: Installed insulation | 14.82 | 2 | 14.78 | .001*** | 0.45 |
| Performed repairs | 388.62 | 2 | 388.37 | < .001*** | 0.27 |
| Outcome: Performed repairs | 10.13 | 2 | 10.10 | .006** | 0.49 |
| Housing subsidy | 737.62 | 2 | 737.15 | < .001*** | 0.41 |
| Outcome: Housing subsidy | 13.92 | 2 | 13.88 | .001*** | 0.56 |

**Table 3: Accuracy Statistics**

| Model | Model Accuracy | Reference |  | ROC-AUC |  |
| --- | --- | --- | --- | --- | --- |
| KNN | 0.69 | 0.63 |  | 0.78 |  |
| AdaBoost | 0.81 | 0.63 |  | 0.86 |  |
| Random Forest | 0.92 | 0.62 |  | 0.92 |  |
| Support Vector | 0.82 | 0.63 |  | 0.98 |  |
| Gradient Boosting | 0.83 | 0.63 |  | 0.89 |  |
| Neural Network | 0.83 | 0.63 |  | 0.89 |  |
