# Supplementary material for: The Paradox of Preparedness - Cold-Related Health Risks in Ukraine's War-Torn Winter
Source: Research Square preprint supplement (doi:10.21203/rs.3.rs-7370640/v1), 2025-08-18
Supplement: Supplementary file 3 [file c56fa5843978ab2ced405482.docx]

| **Table S1. Pearson's Chi-squared test, Fisher's exact test, and Bonferroni correction for multiple testing** | | | | | |
| --- | --- | --- | --- | --- | --- |
| **Features** | **Overall** N = 1,045*1* | **0** N = 955*1* | **1** N = 90*1* | **p-value***2* | **q-value***3* |
| Location |  |  |  | 0.2 | >0.9 |
| Urban | 763 (73%) | 701 (73%) | 62 (69%) |  |  |
| Suburban | 106 (10%) | 92 (9.6%) | 14 (16%) |  |  |
| Rural | 176 (17%) | 162 (17%) | 14 (16%) |  |  |
| War affected | 304 (29%) | 271 (28%) | 33 (37%) | 0.10 | >0.9 |
| Highest level of education |  |  |  | 0.13 | >0.9 |
| Secondary | 109 (10%) | 99 (10%) | 10 (11%) |  |  |
| Vocational | 276 (26%) | 253 (26%) | 23 (26%) |  |  |
| University graduate | 632 (60%) | 581 (61%) | 51 (57%) |  |  |
| Other | 28 (2.7%) | 22 (2.3%) | 6 (6.7%) |  |  |
| Marital status |  |  |  | 0.4 | >0.9 |
| Single | 222 (21%) | 208 (22%) | 14 (16%) |  |  |
| In a relationship (but not living together) | 103 (9.9%) | 95 (9.9%) | 8 (8.9%) |  |  |
| In a relationship (living together) | 483 (46%) | 440 (46%) | 43 (48%) |  |  |
| Separated | 117 (11%) | 107 (11%) | 10 (11%) |  |  |
| Other | 120 (11%) | 105 (11%) | 15 (17%) |  |  |
| Registered as Displaced |  |  |  | 0.5 | >0.9 |
| Yes | 103 (9.9%) | 95 (9.9%) | 8 (8.9%) |  |  |
| No | 905 (87%) | 828 (87%) | 77 (86%) |  |  |
| Other | 37 (3.5%) | 32 (3.4%) | 5 (5.6%) |  |  |
| Purchased warm clothes |  |  |  | 0.14 | >0.9 |
| Yes | 553 (53%) | 499 (52%) | 54 (60%) |  |  |
| No | 188 (18%) | 170 (18%) | 18 (20%) |  |  |
| No need | 304 (29%) | 286 (30%) | 18 (20%) |  |  |
| Stored food/water |  |  |  | 0.2 | >0.9 |
| Yes | 699 (67%) | 631 (66%) | 68 (76%) |  |  |
| No | 148 (14%) | 137 (14%) | 11 (12%) |  |  |
| No need | 198 (19%) | 187 (20%) | 11 (12%) |  |  |
| Purchased Logs |  |  |  | 0.07 | >0.9 |
| Yes | 333 (32%) | 296 (31%) | 37 (41%) |  |  |
| No | 291 (28%) | 265 (28%) | 26 (29%) |  |  |
| No need | 421 (40%) | 394 (41%) | 27 (30%) |  |  |
| Installed windows in house |  |  |  | 0.07 | >0.9 |
| Yes | 239 (23%) | 220 (23%) | 19 (21%) |  |  |
| No | 431 (41%) | 384 (40%) | 47 (52%) |  |  |
| No need | 375 (36%) | 351 (37%) | 24 (27%) |  |  |
| Installed insulation |  |  |  | 0.04 | 0.7 |
| Yes | 190 (18%) | 170 (18%) | 20 (22%) |  |  |
| No | 576 (55%) | 520 (54%) | 56 (62%) |  |  |
| No need | 279 (27%) | 265 (28%) | 14 (16%) |  |  |
| Performed repairs |  |  |  | 0.01 | 0.07 |
| Yes | 135 (13%) | 122 (13%) | 13 (14%) |  |  |
| No | 642 (61%) | 575 (60%) | 67 (74%) |  |  |
| No need | 268 (26%) | 258 (27%) | 10 (11%) |  |  |
| Housing subsidy |  |  |  | 0.2 | >0.9 |
| Yes | 120 (11%) | 105 (11%) | 15 (17%) |  |  |
| No | 777 (74%) | 711 (74%) | 66 (73%) |  |  |
| No need | 148 (14%) | 139 (15%) | 9 (10%) |  |  |
| Air conditioners |  |  |  | 0.12 | >0.9 |
| Yes | 196 (19%) | 181 (19%) | 15 (17%) |  |  |
| Never-had | 802 (77%) | 735 (77%) | 67 (74%) |  |  |
| Other | 47 (4.5%) | 39 (4.1%) | 8 (8.9%) |  |  |
| Heating without electricity | 511 (49%) | 458 (48%) | 53 (59%) | 0.04 | 0.9 |
| Heating with electricity | 924 (88%) | 842 (88%) | 82 (91%) | 0.4 | >0.9 |
| *1*n (%) | | | | | |
| *2*Pearson's Chi-squared test; Fisher's exact test | | | | | |
| *3*Bonferroni correction for multiple testing | | | | | |

| **Table S2. Evaluation of feature selection predicting cold injury among older Ukrainians (>60 years) who were affected by the war (n=33).** | | | | | | | | |
| --- | --- | --- | --- | --- | --- | --- | --- | --- |
|  | **Yes** | | | | **No** | | | |
| **Features** | **0** N = 271*1* | **1** N = 33*1* | **p-value***2* | **q-value***3* | **0** N = 684*1* | **1** N = 57*1* | **p-value***4* | **q-value***3* |
| Location |  |  | 0.2 | >0.9 |  |  | 0.6 | >0.9 |
| Urban | 210 (77%) | 24 (73%) |  |  | 491 (72%) | 38 (67%) |  |  |
| Suburban | 25 (9.2%) | 6 (18%) |  |  | 67 (9.8%) | 8 (14%) |  |  |
| Rural | 36 (13%) | 3 (9.1%) |  |  | 126 (18%) | 11 (19%) |  |  |
| Highest education |  |  | 0.3 | >0.9 |  |  | 0.2 | >0.9 |
| Secondary | 26 (9.6%) | 3 (9.1%) |  |  | 73 (11%) | 7 (12%) |  |  |
| Vocational | 80 (30%) | 7 (21%) |  |  | 173 (25%) | 16 (28%) |  |  |
| Undergraduate | 160 (59%) | 21 (64%) |  |  | 421 (62%) | 30 (53%) |  |  |
| Other | 5 (1.8%) | 2 (6.1%) |  |  | 17 (2.5%) | 4 (7.0%) |  |  |
| Marital status |  |  | 0.8 | >0.9 |  |  | 0.7 | >0.9 |
| Single | 40 (15%) | 3 (9.1%) |  |  | 168 (25%) | 11 (19%) |  |  |
| In a relationship (but not living together) | 32 (12%) | 4 (12%) |  |  | 63 (9.2%) | 4 (7.0%) |  |  |
| In a relationship (Living together) | 126 (46%) | 15 (45%) |  |  | 314 (46%) | 28 (49%) |  |  |
| Separated | 33 (12%) | 4 (12%) |  |  | 74 (11%) | 6 (11%) |  |  |
| Other | 40 (15%) | 7 (21%) |  |  | 65 (9.5%) | 8 (14%) |  |  |
| Purchased warm clothes |  |  | 0.07 | >0.9 |  |  | 0.5 | >0.9 |
| Yes | 145 (54%) | 24 (73%) |  |  | 354 (52%) | 30 (53%) |  |  |
| No | 60 (22%) | 6 (18%) |  |  | 110 (16%) | 12 (21%) |  |  |
| No need | 66 (24%) | 3 (9.1%) |  |  | 220 (32%) | 15 (26%) |  |  |
| Stored food water |  |  | 0.6 | >0.9 |  |  | 0.3 | >0.9 |
| Yes | 196 (72%) | 27 (82%) |  |  | 435 (64%) | 41 (72%) |  |  |
| No | 42 (15%) | 3 (9.1%) |  |  | 95 (14%) | 8 (14%) |  |  |
| No need | 33 (12%) | 3 (9.1%) |  |  | 154 (23%) | 8 (14%) |  |  |
| Purchased Logs |  |  | 0.051 | 0.9 |  |  | 0.4 | >0.9 |
| Yes | 76 (28%) | 16 (48%) |  |  | 220 (32%) | 21 (37%) |  |  |
| No | 93 (34%) | 9 (27%) |  |  | 172 (25%) | 17 (30%) |  |  |
| No need | 102 (38%) | 8 (24%) |  |  | 292 (43%) | 19 (33%) |  |  |
| Installed windows |  |  | 0.4 | >0.9 |  |  | 0.2 | >0.9 |
| Yes | 57 (21%) | 7 (21%) |  |  | 163 (24%) | 12 (21%) |  |  |
| No | 119 (44%) | 18 (55%) |  |  | 265 (39%) | 29 (51%) |  |  |
| No need | 95 (35%) | 8 (24%) |  |  | 256 (37%) | 16 (28%) |  |  |
| Installed insulation |  |  | 0.2 | >0.9 |  |  | 0.2 | >0.9 |
| Yes | 43 (16%) | 8 (24%) |  |  | 127 (19%) | 12 (21%) |  |  |
| No | 160 (59%) | 21 (64%) |  |  | 360 (53%) | 35 (61%) |  |  |
| No need | 68 (25%) | 4 (12%) |  |  | 197 (29%) | 10 (18%) |  |  |
| Performed repairs |  |  | 0.022 | 0.4 |  |  | 0.067 | >0.9 |
| Yes | 26 (9.6%) | 5 (15%) |  |  | 96 (14%) | 8 (14%) |  |  |
| No | 177 (65%) | 26 (79%) |  |  | 398 (58%) | 41 (72%) |  |  |
| No need | 68 (25%) | 2 (6.1%) |  |  | 190 (28%) | 8 (14%) |  |  |
| Housing subsidy |  |  | 0.14 | >0.9 |  |  | 0.7 | >0.9 |
| Yes | 28 (10%) | 7 (21%) |  |  | 77 (11%) | 8 (14%) |  |  |
| No | 213 (79%) | 24 (73%) |  |  | 498 (73%) | 42 (74%) |  |  |
| No need | 30 (11%) | 2 (6.1%) |  |  | 109 (16%) | 7 (12%) |  |  |
| Air conditioners |  |  | 0.3 | >0.9 |  |  | 0.4 | >0.9 |
| Yes | 52 (19%) | 6 (18%) |  |  | 129 (19%) | 9 (16%) |  |  |
| Never-had | 205 (76%) | 23 (70%) |  |  | 530 (77%) | 44 (77%) |  |  |
| Other | 14 (5.2%) | 4 (12%) |  |  | 25 (3.7%) | 4 (7.0%) |  |  |
| Heating without electricity | 119 (44%) | 22 (67%) | 0.013 | 0.2 | 339 (50%) | 31 (54%) | 0.5 | >0.9 |
| Heating with electricity | 239 (88%) | 30 (91%) | >0.9 | >0.9 | 603 (88%) | 52 (91%) | 0.5 | >0.9 |
| *1*n (%) | | | | | | | | |
| *2*Fisher's exact test; Pearson's Chi-squared test | | | | | | | | |
| *3*Bonferroni correction for multiple testing | | | | | | | | |
| *4*Pearson's Chi-squared test; Fisher's exact test | | | | | | | | |

**Table S3. Analysis of Frequency: the main effects, i.e., the individual impact of significant categorical features & interaction effects (Significant Interactions only)**

| Variables | G | *df* | G-corrected | *p* | *η*² |
| --- | --- | --- | --- | --- | --- |
| Total | 1,067.55 | 5 |  |  |  |
| Outcome | 835.31 | 1 | 834.91 | < .001*** | 0.44 |
| Installed insulation | 225.22 | 2 | 225.07 | < .001*** | 0.18 |
| Outcome: Installed insulation | 7.02 | 2 | 7.00 | .030* | 0.51 |
| Performed repairs | 388.62 | 2 | 388.37 | < .001*** | 0.27 |
| Outcome: Performed repairs | 12.85 | 2 | 12.81 | .002** | 0.54 |
| Heating without electricity | 0.51 | 1 | 0.51 | .477 | 0.00 |
| Outcome: Heating without electricity | 3.95 | 1 | 3.94 | .047* | 0.45 |

**Table S4. ANOFA of simple effect, i.e., effects within specific subgroups (only significant variables)**

| Variables | G | *df* | G-corrected | *p* | *η*² |
| --- | --- | --- | --- | --- | --- |
| Installed insulation |  |  |  |  |  |
| outcome | Yes | 135.53 | 1 | 135.46 | < .001*** | 0.42 |
| outcome | No | 431.09 | 1 | 430.88 | < .001*** | 0.43 |
| outcome | No need | 275.71 | 1 | 275.58 | < .001*** | 0.50 |
| Performed repairs | G | *df* | G-corrected | *p* | *η*² |
| outcome | Yes | 101.60 | 1 | 101.55 | < .001*** | 0.43 |
| outcome | No | 460.42 | 1 | 460.20 | < .001*** | 0.42 |
| outcome | No need | 286.14 | 1 | 286.00 | < .001*** | 0.52 |
| Heating without electricity | G | *df* | G-corrected | *p* | *η*² |
| outcome | No | 471.36 | 1 | 471.14 | < .001*** | 0.47 |
| outcome | Yes | 367.89 | 1 | 367.71 | < .001*** | 0.42 |

**Table S5. Comparison of Multiple Feature Selection Methods**

| ***Information gain*** | ***Gain ratio*** | ***Chi-squared*** | ***Symmetrical uncertainty*** | ***Relief*** |
| --- | --- | --- | --- | --- |
| Performed Repairs | Performed repairs | Performed repairs | Performed repairs | Employment status |
| Employment status | Internally displaced | Employment status | Employment status | Purchased logs |
| Installed insulation | Installed insulation | Installed insulation | Installed insulation | Performed repairs |
| Installed windows | Heating without electricity | Highest education | Highest education | Installed windows |
| Purchased logs | Air conditioners | Installed windows | Installed windows | Registered as displaced |
| Highest education | Installed windows | Purchase logs | Purchased logs | Air conditioners |
| Purchased warm clothes | Employment status | Air conditioners | Air conditioners | Stored food water |
| Stored food water | Purchased logs | Purchased warm clothes | Purchased warm clothes | Heating without electricity |
| Heating without electricity | Highest education | Marital status | Marital status | War affected |
| Marital status | Stored food water | Heating without electricity | Heating without electricity | Marital status |

| **Table S6. Pearson's Chi-squared test, Fisher's exact test & Bonferroni correction for multiple testing** | | | | | |
| --- | --- | --- | --- | --- | --- |
| **Characteristic** | **Overall**, N = 1,045*1* | **0**, N = 147*1* | **1**, N = 898*1* | **p-value***2* | **q-value***3* |
| Location |  |  |  | 0.056 | >0.9 |
| Urban | 763 (73%) | 119 (81%) | 644 (72%) |  |  |
| Suburban | 106 (10%) | 9 (6.1%) | 97 (11%) |  |  |
| Rural | 176 (17%) | 19 (13%) | 157 (17%) |  |  |
| War affected | 304 (29%) | 32 (22%) | 272 (30%) | 0.03 | 0.6 |
| Highest education |  |  |  | 0.2 | >0.9 |
| Secondary | 109 (10%) | 15 (10%) | 94 (10%) |  |  |
| Vocational | 276 (26%) | 35 (24%) | 241 (27%) |  |  |
| University Graduate | 632 (60%) | 89 (61%) | 543 (60%) |  |  |
| Other | 28 (2.7%) | 8 (5.4%) | 20 (2.2%) |  |  |
| Marital status |  |  |  | <0.001 | 0.007 |
| Single | 222 (21%) | 50 (34%) | 172 (19%) |  |  |
| In a relationship (Not living together) | 103 (9.9%) | 8 (5.4%) | 95 (11%) |  |  |
| In a relationship (Living together) | 483 (46%) | 54 (37%) | 429 (48%) |  |  |
| Separated | 117 (11%) | 15 (10%) | 102 (11%) |  |  |
| Other | 120 (11%) | 20 (14%) | 100 (11%) |  |  |
| Purchased warm clothes |  |  |  | <0.001 | 0.006 |
| Yes | 553 (53%) | 60 (41%) | 493 (55%) |  |  |
| No | 188 (18%) | 24 (16%) | 164 (18%) |  |  |
| No need | 304 (29%) | 63 (43%) | 241 (27%) |  |  |
| Stored food & water |  |  |  | <0.001 | <0.001 |
| Yes | 699 (67%) | 81 (55%) | 618 (69%) |  |  |
| No | 148 (14%) | 18 (12%) | 130 (14%) |  |  |
| No need | 198 (19%) | 48 (33%) | 150 (17%) |  |  |
| Purchased logs |  |  |  | 0.002 | 0.02 |
| Yes | 333 (32%) | 36 (24%) | 297 (33%) |  |  |
| No | 291 (28%) | 32 (22%) | 259 (29%) |  |  |
| No need | 421 (40%) | 79 (54%) | 342 (38%) |  |  |
| Installed windows |  |  |  | 0.3 | >0.9 |
| Yes | 239 (23%) | 27 (18%) | 212 (24%) |  |  |
| No | 431 (41%) | 61 (41%) | 370 (41%) |  |  |
| No need | 375 (36%) | 59 (40%) | 316 (35%) |  |  |
| Installed insulation |  |  |  | <0.001 | 0.008 |
| Yes | 190 (18%) | 29 (20%) | 161 (18%) |  |  |
| No | 576 (55%) | 61 (41%) | 515 (57%) |  |  |
| No need | 279 (27%) | 57 (39%) | 222 (25%) |  |  |
| Performed repairs |  |  |  | 0.005 | 0.09 |
| Yes | 135 (13%) | 13 (8.8%) | 122 (14%) |  |  |
| No | 642 (61%) | 81 (55%) | 561 (62%) |  |  |
| No need | 268 (26%) | 53 (36%) | 215 (24%) |  |  |
| Housing subsidy |  |  |  | <0.001 | 0.007 |
| Yes | 120 (11%) | 12 (8.2%) | 108 (12%) |  |  |
| No | 777 (74%) | 99 (67%) | 678 (76%) |  |  |
| No need | 148 (14%) | 36 (24%) | 112 (12%) |  |  |
| Air conditioners |  |  |  | 0.8 | >0.9 |
| Yes | 196 (19%) | 29 (20%) | 167 (19%) |  |  |
| Never-had | 802 (77%) | 113 (77%) | 689 (77%) |  |  |
| Other | 47 (4.5%) | 5 (3.4%) | 42 (4.7%) |  |  |
| Heating without electricity | 511 (49%) | 64 (44%) | 447 (50%) | 0.2 | >0.9 |
| Heating with electricity | 924 (88%) | 128 (87%) | 796 (89%) | 0.6 | >0.9 |
| *1*n (%) | | | | | |
| *2*Pearson's Chi-squared test; Fisher's exact test | | | | | |
| *3*Bonferroni correction for multiple testing | | | | | |

| **Table S7. Evaluation of feature selection predicting respiratory infections among older Ukrainians (>60 years) who were affected by the war (n=272).** | | | | | | | | |
| --- | --- | --- | --- | --- | --- | --- | --- | --- |
|  | **Yes** | | | | **No** | | | |
| **Characteristic** | **0**, N = 32*1* | **1**, N = 272*1* | **p-value***2* | **q-value***3* | **0**, N = 115*1* | **1**, N = 626*1* | **p-value***4* | **q-value***3* |
| ***Location*** |  |  | 0.5 | >0.9 |  |  | 0.007 | 0.12 |
| Urban | 24 (75%) | 210 (77%) |  |  | 95 (83%) | 434 (69%) |  |  |
| Suburban | 5 (16%) | 26 (9.6%) |  |  | 4 (3.5%) | 71 (11%) |  |  |
| Rural | 3 (9.4%) | 36 (13%) |  |  | 16 (14%) | 121 (19%) |  |  |
| ***Highest education*** |  |  | 0.4 | >0.9 |  |  | 0.3 | >0.9 |
| Secondary | 3 (9.4%) | 26 (9.6%) |  |  | 12 (10%) | 68 (11%) |  |  |
| Vocational | 10 (31%) | 77 (28%) |  |  | 25 (22%) | 164 (26%) |  |  |
| University Graduate | 17 (53%) | 164 (60%) |  |  | 72 (63%) | 379 (61%) |  |  |
| Other | 2 (6.3%) | 5 (1.8%) |  |  | 6 (5.2%) | 15 (2.4%) |  |  |
| ***Marital status*** |  |  | 0.13 | >0.9 |  |  | 0.003 | 0.04 |
| Single | 9 (28%) | 34 (13%) |  |  | 41 (36%) | 138 (22%) |  |  |
| In relationship (Not living together) | 3 (9.4%) | 33 (12%) |  |  | 5 (4.3%) | 62 (9.9%) |  |  |
| In relationship (Living together) | 14 (44%) | 127 (47%) |  |  | 40 (35%) | 302 (48%) |  |  |
| Separated | 1 (3.1%) | 36 (13%) |  |  | 14 (12%) | 66 (11%) |  |  |
| Other | 5 (16%) | 42 (15%) |  |  | 15 (13%) | 58 (9.3%) |  |  |
| ***Registered as displaced*** |  |  | 0.7 | >0.9 |  |  | 0.2 | >0.9 |
| Yes | 7 (22%) | 56 (21%) |  |  | 5 (4.3%) | 35 (5.6%) |  |  |
| No | 23 (72%) | 205 (75%) |  |  | 103 (90%) | 574 (92%) |  |  |
| Other | 2 (6.3%) | 11 (4.0%) |  |  | 7 (6.1%) | 17 (2.7%) |  |  |
| ***Purchased warm clothes*** |  |  | 0.4 | >0.9 |  |  | 0.001 | 0.02 |
| Yes | 15 (47%) | 154 (57%) |  |  | 45 (39%) | 339 (54%) |  |  |
| No | 7 (22%) | 59 (22%) |  |  | 17 (15%) | 105 (17%) |  |  |
| No need | 10 (31%) | 59 (22%) |  |  | 53 (46%) | 182 (29%) |  |  |
| ***Stored food water*** |  |  | 0.3 | >0.9 |  |  | <0.001 | 0.003 |
| Yes | 23 (72%) | 200 (74%) |  |  | 58 (50%) | 418 (67%) |  |  |
| No | 3 (9.4%) | 42 (15%) |  |  | 15 (13%) | 88 (14%) |  |  |
| No need | 6 (19%) | 30 (11%) |  |  | 42 (37%) | 120 (19%) |  |  |
| ***Purchased logs*** |  |  | 0.2 | >0.9 |  |  | 0.010 | 0.2 |
| Yes | 8 (25%) | 84 (31%) |  |  | 28 (24%) | 213 (34%) |  |  |
| No | 8 (25%) | 94 (35%) |  |  | 24 (21%) | 165 (26%) |  |  |
| No need | 16 (50%) | 94 (35%) |  |  | 63 (55%) | 248 (40%) |  |  |
| ***Installed windows*** |  |  | 0.5 | >0.9 |  |  | 0.5 | >0.9 |
| Yes | 4 (13%) | 60 (22%) |  |  | 23 (20%) | 152 (24%) |  |  |
| No | 16 (50%) | 121 (44%) |  |  | 45 (39%) | 249 (40%) |  |  |
| No need | 12 (38%) | 91 (33%) |  |  | 47 (41%) | 225 (36%) |  |  |
| ***Installed insulation*** |  |  | 0.4 | >0.9 |  |  | <0.001 | 0.007 |
| Yes | 8 (25%) | 43 (16%) |  |  | 21 (18%) | 118 (19%) |  |  |
| No | 16 (50%) | 165 (61%) |  |  | 45 (39%) | 350 (56%) |  |  |
| No need | 8 (25%) | 64 (24%) |  |  | 49 (43%) | 158 (25%) |  |  |
| ***Performed repairs*** |  |  | 0.8 | >0.9 |  |  | 0.002 | 0.03 |
| Yes | 2 (6.3%) | 29 (11%) |  |  | 11 (9.6%) | 93 (15%) |  |  |
| No | 23 (72%) | 180 (66%) |  |  | 58 (50%) | 381 (61%) |  |  |
| No need | 7 (22%) | 63 (23%) |  |  | 46 (40%) | 152 (24%) |  |  |
| ***Housing subsidy*** |  |  | 0.7 | >0.9 |  |  | <0.001 | 0.002 |
| Yes | 2 (6.3%) | 33 (12%) |  |  | 10 (8.7%) | 75 (12%) |  |  |
| No | 27 (84%) | 210 (77%) |  |  | 72 (63%) | 468 (75%) |  |  |
| No need | 3 (9.4%) | 29 (11%) |  |  | 33 (29%) | 83 (13%) |  |  |
| ***Air conditioners*** |  |  | >0.9 | >0.9 |  |  | >0.9 | >0.9 |
| Yes | 6 (19%) | 52 (19%) |  |  | 23 (20%) | 115 (18%) |  |  |
| Never-had | 25 (78%) | 203 (75%) |  |  | 88 (77%) | 486 (78%) |  |  |
| Other | 1 (3.1%) | 17 (6.3%) |  |  | 4 (3.5%) | 25 (4.0%) |  |  |
| Heating without electricity | 14 (44%) | 127 (47%) | 0.8 | >0.9 | 50 (43%) | 320 (51%) | 0.13 | >0.9 |
| Heating with electricity | 26 (81%) | 243 (89%) | 0.2 | >0.9 | 102 (89%) | 553 (88%) | >0.9 | >0.9 |
| *1*n (%) | | | | | | | | |
| *2*Fisher's exact test; Pearson's Chi-squared test | | | | | | | | |
| *3*Bonferroni correction for multiple testing | | | | | | | | |
| *4*Pearson's Chi-squared test; Fisher's exact test | | | | | | | | |

**Table S8. ANOFA of simple effects or effects within specific subgroups (only significant)**

| Location | G | *df* | G-corrected | *p* | *η*² |
| --- | --- | --- | --- | --- | --- |
| outcome | Urban | 397.11 | 1 | 396.92 | < .001*** | 0.34 |
| outcome | Suburban | 85.34 | 1 | 85.30 | < .001*** | 0.45 |
| outcome | Rural | 123.53 | 1 | 123.47 | < .001*** | 0.41 |
| Internally displaced |  |  |  |  |  |
| outcome | Yes | 102.42 | 1 | 102.37 | < .001*** | 0.52 |
| outcome | No | 510.76 | 1 | 510.52 | < .001*** | 0.35 |
| War affected |  |  |  |  |  |
| outcome | Yes | 216.84 | 1 | 216.74 | < .001*** | 0.42 |
| outcome | No | 387.59 | 1 | 387.40 | < .001*** | 0.34 |
| Marital status |  |  |  |  |  |
| outcome | Single | 70.91 | 1 | 70.88 | < .001*** | 0.24 |
| outcome | In a relationship (Not living together) | 86.54 | 1 | 86.50 | < .001*** | 0.46 |
| outcome | In a relationship (Living together) | 331.22 | 1 | 331.07 | < .001*** | 0.41 |
| outcome | Separated | 72.58 | 1 | 72.55 | < .001*** | 0.38 |
| outcome | Other | 58.22 | 1 | 58.19 | < .001*** | 0.33 |
| Stored food water |  |  |  |  |  |
| outcome | Yes | 467.65 | 1 | 467.42 | < .001*** | 0.40 |
| outcome | No | 95.61 | 1 | 95.56 | < .001*** | 0.39 |
| outcome | No need | 55.16 | 1 | 55.13 | < .001*** | 0.22 |
| Purchased logs |  |  |  |  |  |
| outcome | Yes | 233.50 | 1 | 233.39 | < .001*** | 0.41 |
| outcome | No | 201.78 | 1 | 201.69 | < .001*** | 0.41 |
| outcome | No need | 177.12 | 1 | 177.03 | < .001*** | 0.30 |
| Installed insulation |  |  |  |  |  |
| outcome | Yes | 101.04 | 1 | 100.99 | < .001*** | 0.35 |
| outcome | No | 409.29 | 1 | 409.09 | < .001*** | 0.42 |
| outcome | No need | 104.26 | 1 | 104.21 | < .001*** | 0.27 |
| Performed repairs |  |  |  |  |  |
| outcome | Yes | 101.60 | 1 | 101.55 | < .001*** | 0.43 |
| outcome | No | 403.32 | 1 | 403.12 | < .001*** | 0.39 |
| outcome | No need | 104.98 | 1 | 104.93 | < .001*** | 0.28 |
| Housing subsidy |  |  |  |  |  |
| outcome | Yes | 88.34 | 1 | 88.29 | < .001*** | 0.42 |
| outcome | No | 484.39 | 1 | 484.16 | < .001*** | 0.38 |
| outcome | No need | 40.95 | 1 | 40.93 | < .001*** | 0.22 |

**Table S9. Comparison of Multiple Feature Selection Methods**

| **Information gain** | **Gain ratio** | **Chi-squared** | **Symmetrical uncertainty** | **Relief** |
| --- | --- | --- | --- | --- |
| Marital status | Internally displaced | Stored food & water | Stored food & water | Marital status |
| Stored food & water | Stored food & water | Marital status | Marital status | Housing subsidy |
| Purchased warm clothes | Housing subsidy | Purchased warm clothes | Purchased warm clothes | Internal migration |
| Installed insulation | Purchased warm clothes | Housing subsidy | Housing subsidy | Purchased logs |
| Housing subsidy | Installed insulation | Installed insulation | Installed insulation | Employment status |
| Internally displaced | Marital status | Purchased logs | Purchased logs | Air conditioners |
| Purchased logs | Purchased logs | Performed repairs | Performed repairs | Heating without electricity |
| Performed repairs | Performed repairs | Internally displaced | Internally displaced | Highest education |
| Employment status | Location | Employment status | Employment status | Performed repairs |
| Location | Internal migration | Location | Location | Installed windows |
